# Supplementary material
Source: HighWire-hosted journal article supplement (http://molpharm.aspetjournals.org/highwire/filestream/80772/field_highwire_adjunct_files/0/108472suppl_figs.pdf)
Supplement: 108472suppl_figs.pdf [file 108472suppl_figs.pdf]

**Molecular Pharmacology**

**Supplemental Data**

**Pore polarity and charge determine differential block of Kir1.1 and Kir7.1 potassium channels by the small-molecule inhibitor VU590**

Sujay V. Kharade, Jonathan H. Sheehan, Eric E. Figueroa, Jens Meiler, and Jerod. S. Denton

Department of Anesthesiology, Vanderbilt University Medical Center, Nashville, TN, 37232 (SVK, EEF, JSD)

Department of Pharmacology, Vanderbilt University, Nashville, TN 37232 (EEF, JSD),

Department of Biochemistry, Vanderbilt University, Nashville, TN 37232 (JHS, JM),

Center for Structural Biology, Vanderbilt University, Nashville, TN 37232 (JHS, JM),

Department of Chemistry, Vanderbilt University, Nashville, TN 37232 (JM),

Institute of Chemical Biology, Vanderbilt University, Nashville, TN 37232 (JSD)

## Figure S1

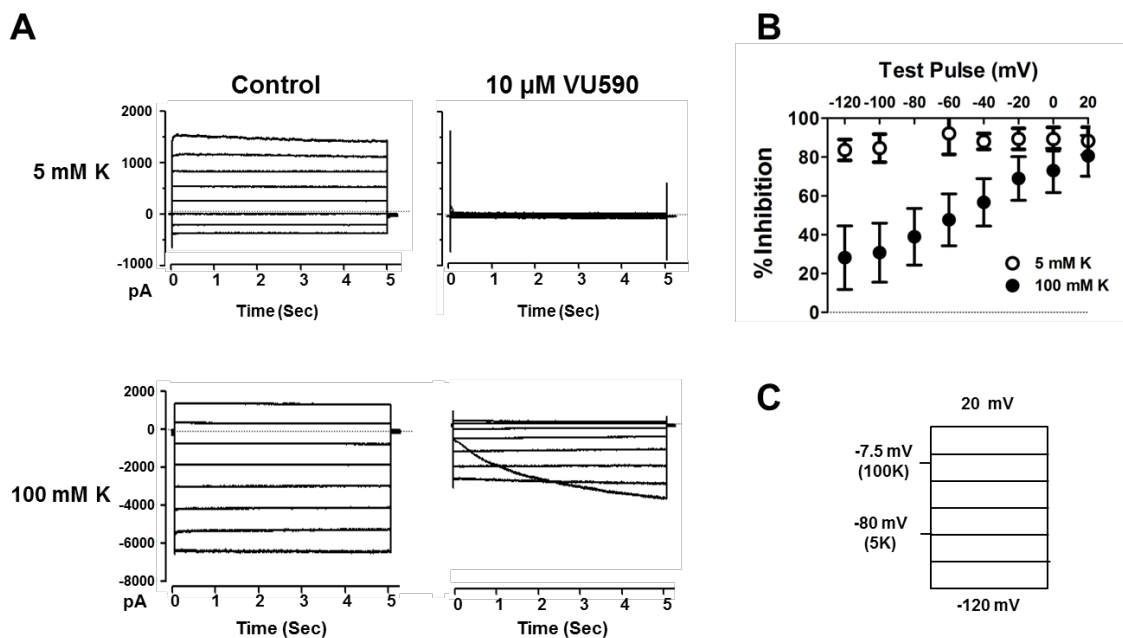

**Figure S1. Voltage- and  $K^+$ -dependence of Kir1.1 block by VU590.** A) Representative whole-cell Kir1.1 currents evoked from holding potential of  $-80$  mV ( $5$  mM bath K) or  $-7.5$  mV ( $100$  mM bath) to  $-120$  mV to  $120$  mV in  $20$ -mV increments. Currents were measured before control) or after bath addition of  $10$   $\mu$ M VU590. B) Mean  $\pm$  SD percent Kir1.1 inhibition calculated at each test potential in the presence of  $5$  mM or  $100$  mM bath  $K^+$  ( $n=4$  each). C) Voltage clamp protocol used to evoke currents. Step duration was  $5$  sec.

## Figure S2

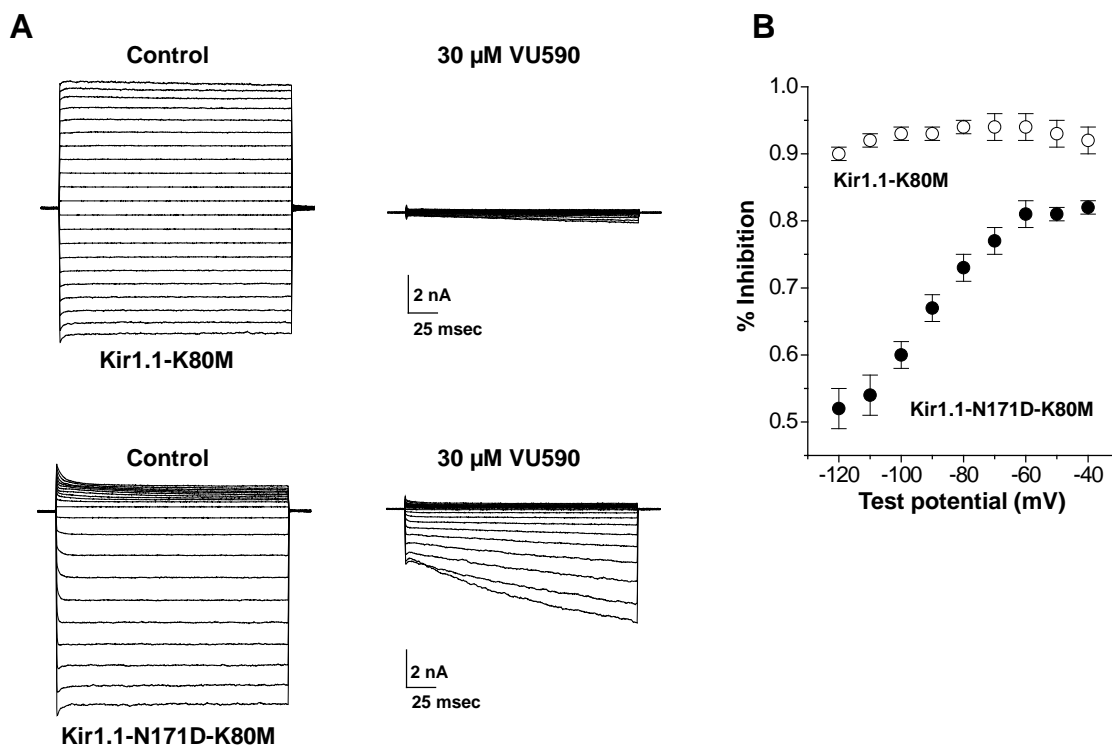

**Figure S2. The N171D mutation increases the voltage- and K-dependence of Kir1.1-K80M block by VU590.** A) Whole-cell Kir1.1-K80M (top) or Kir1.1-K80M-N171D (bottom) current traces evoked by voltage steps between -120 mV and 80 mV in 10 mV increments from a holding potential of -25 mV. Currents were recorded in the presence of 50 mM bath  $K^+$  before (control) or after bath addition of 30  $\mu$ M VU590. C) Mean  $\pm$  SEM fraction of Kir1.1-K80M (open circles) or Kir1.1-K80M-N171D (closed circles) current blocked at the indicated test potentials (n=5 each).

## Figure S3

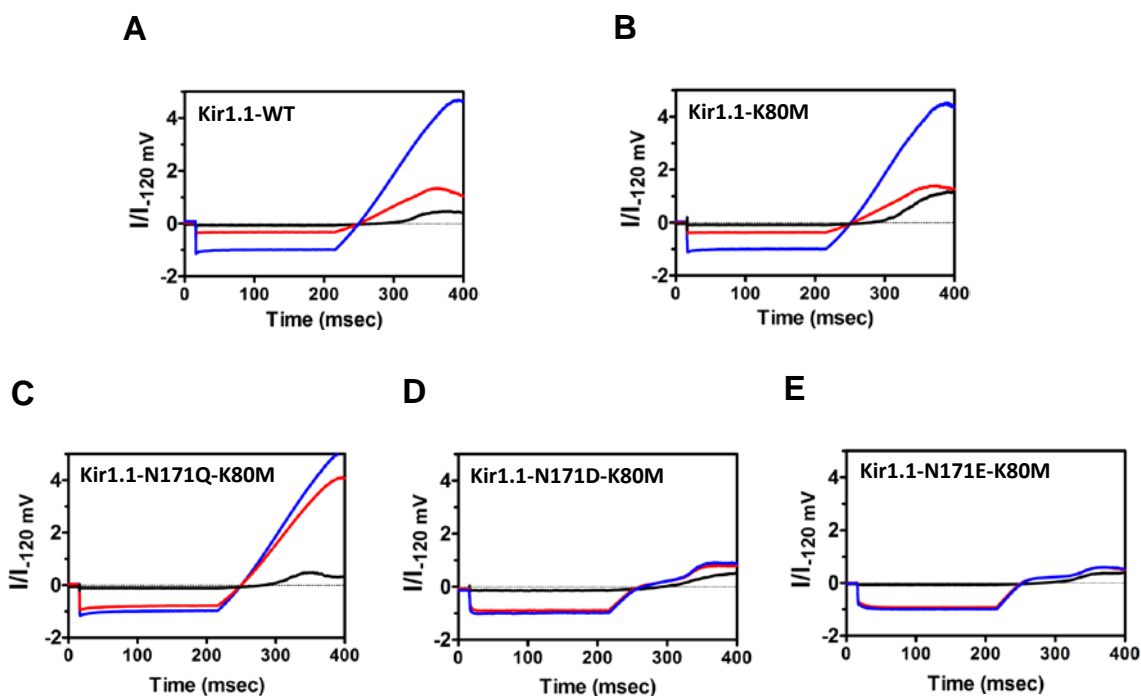

**Figure S3. Representative whole-cell Kir1.1 current traces.** A) Kir1.1-WT, B) Kir1.1-K80M, C) Kir1.1-N171Q-K80M, D) Kir1.1-N171D-K80M, and E) Kir1.1-N171E-K80M. Currents were evoked from a holding potential of -75 mV by stepping to -120 mV for 200 msec and then ramping to 120 mV (see Methods), in the absence (blue) or presence (red) of 300 nM VU590 and 2 mM barium chloride (black).

Figure S4

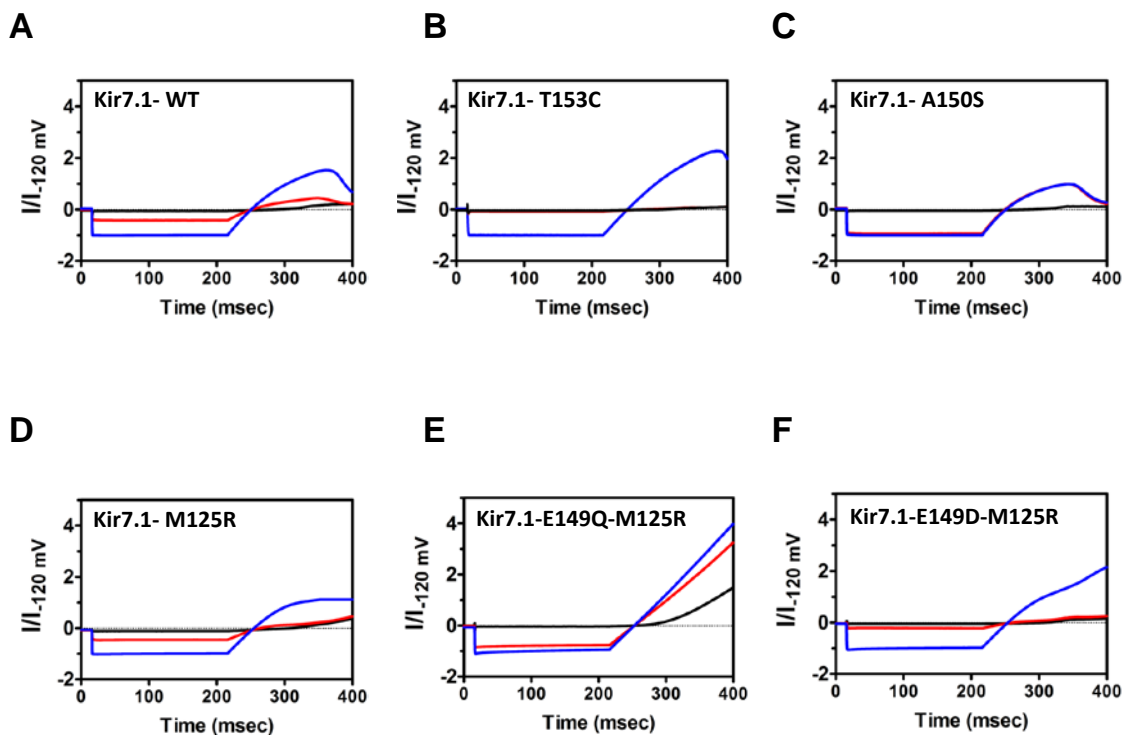

**Figure S4. Representative whole-cell Kir7.1 current traces.** A) Kir7.1-WT, B) Kir7.1-T153C, C) Kir7.1-A150S, D) Kir7.1-M125R, E) Kir7.1-E149Q-M125R, and F) Kir7.1-E149D-M125R. Currents were evoked from a holding potential of -75 mV by stepping to -120 mV for 200 msec and then ramping to 120 mV (see Methods), in the absence (blue) or presence (red) of 10 μM VU590 and 2 mM barium chloride (black).
